# Supplementary material for: Usefulness of Tree Species as Urban Health Indicators
Source: MDPI journal article supplement (doi:10.3390/plants10122797), 2021-12-17
Supplement: s1 [file s1]

**Supplementary Material Table S1.** The Canonical Discriminant Analysis output of studied tree species based on the elemental concentrations of leaves.

| Parameters            | DF1     | DF2     | DF3    | DF4    | DF5    | DF6    | DF7   |
|-----------------------|---------|---------|--------|--------|--------|--------|-------|
| Eigenvalue            | 184.258 | 23.420  | 8.387  | 5.334  | 5.102  | 1.400  | 0.956 |
| % of Variance         | 80.5    | 10.2    | 3.7    | 2.3    | 2.2    | 0.6    | 0.4   |
| Cumulative %          | 80.5    | 90.7    | 94.4   | 96.7   | 99     | 99.6   | 100   |
| Canonical Correlation | 0.997   | 0.979   | 0.945  | 0.918  | 0.914  | 0.764  | 0.699 |
| Wilks' Lambda         | 0.000   | 0.000   | 0.001  | 0.006  | 0.035  | 0.213  | 0.511 |
| Chi-square            | 166.502 | 111.674 | 78.122 | 54.610 | 35.227 | 16.237 | 7.045 |
| df                    | 105     | 84      | 65     | 48     | 33     | 20     | 9     |
| Significance          | <0.001  | 0.023   | 0.127  | 0.238  | 0.363  | 0.702  | 0.632 |

**Supplementary Material Table S2.** The instrumental conditions for ICP-OES for trace elemental analysis.

|                          |                                                                                                                                                                                                                                                                                                                                                                                   |
|--------------------------|-----------------------------------------------------------------------------------------------------------------------------------------------------------------------------------------------------------------------------------------------------------------------------------------------------------------------------------------------------------------------------------|
| Wavelengths/nm           | <b>Al:</b> 396.152<br><b>Ba:</b> 455.403<br><b>Ca:</b> 422.673<br><b>Cd:</b> 226.502<br><b>Co:</b> 228.615<br><b>Cr:</b> 267.716<br><b>Cu:</b> 324.754<br><b>Fe:</b> 238.204<br><b>K:</b> 766.491<br><b>Li:</b> 670.783<br><b>Mg:</b> 279.553<br><b>Mn:</b> 257.610<br><b>Na:</b> 589.592<br><b>Ni:</b> 216.555<br><b>Pb:</b> 220.353<br><b>Sr:</b> 407.771<br><b>Zn:</b> 213.857 |
| Background correction    | fitted                                                                                                                                                                                                                                                                                                                                                                            |
| Number of replicates     | 3                                                                                                                                                                                                                                                                                                                                                                                 |
| Pump speed (rpm)         | 15                                                                                                                                                                                                                                                                                                                                                                                |
| Rinse time (sec)         | 30                                                                                                                                                                                                                                                                                                                                                                                |
| Nebulizer flow (l/min)   | 0.7                                                                                                                                                                                                                                                                                                                                                                               |
| Analysis pump rate (rpm) | 15                                                                                                                                                                                                                                                                                                                                                                                |
| Plasma mode              | dual                                                                                                                                                                                                                                                                                                                                                                              |
| RF power (kW)            | 1.2                                                                                                                                                                                                                                                                                                                                                                               |
| Read time (sec)          | 5                                                                                                                                                                                                                                                                                                                                                                                 |
| Plasma flow (l/min)      | 12.0                                                                                                                                                                                                                                                                                                                                                                              |
| Sample introduction      | SPS 4 autosampler                                                                                                                                                                                                                                                                                                                                                                 |
